# Supplementary material for: A general approach to electrochemical deposition of high quality free-standing noble metal (Pd, Pt, Au, Ag) sub-micron tubes composed of nanoparticles in polar aprotic solvent
Source: Royal Society of Chemistry journal article supplement (doi:10.1039/b920705h), 2009-12-10
Supplement: b920705h.pdf [file b920705h.pdf]

Supplementary Information

**A general approach to electrochemical deposition of high quality  
free-standing noble metal (Pd, Pt, Au, Ag) sub-micron tubes  
composed of nanoparticles in polar aprotic solvent**

Chunhua Cui, Hui-Hui Li, Shu-Hong Yu\*

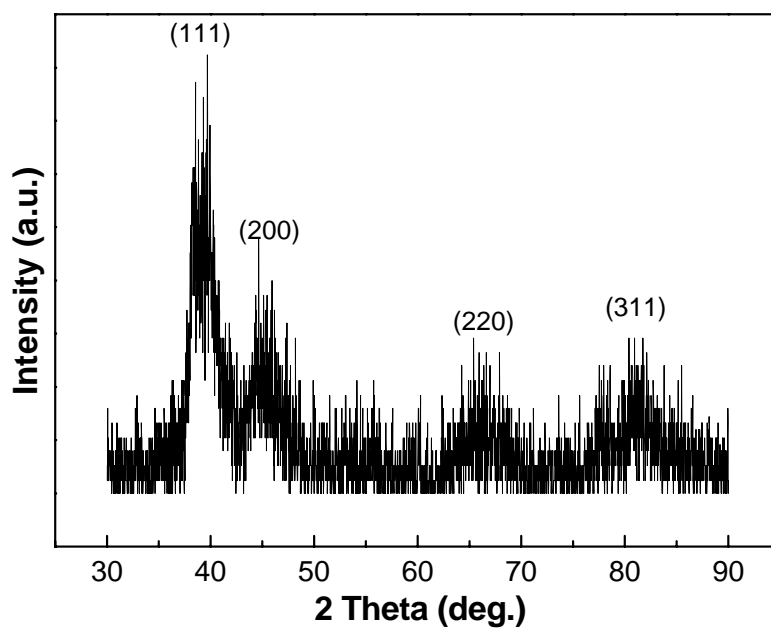

**Fig. S1** XRD pattern of the Pd STNs after removal of AAO template with NaOH (2.0 M).

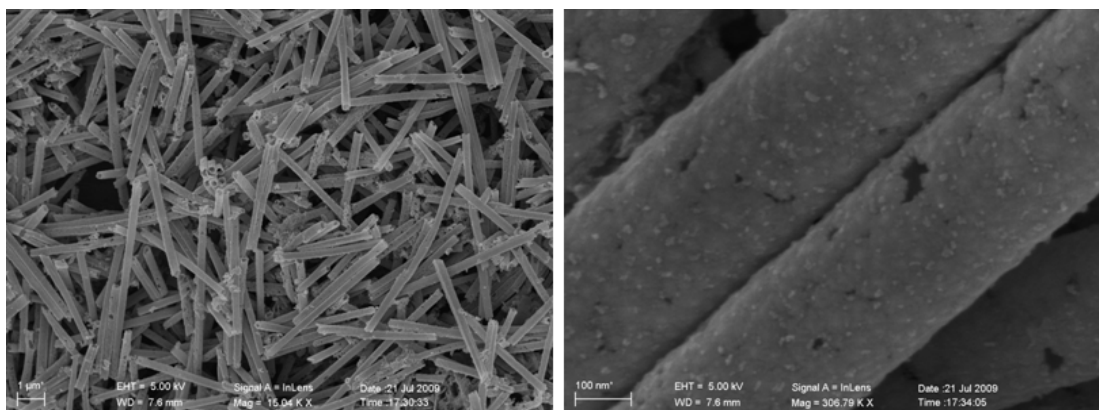

**Fig. S2** SEM images of dispersed Pd STNs under high intensity ultrasound treatment at different magnifications.

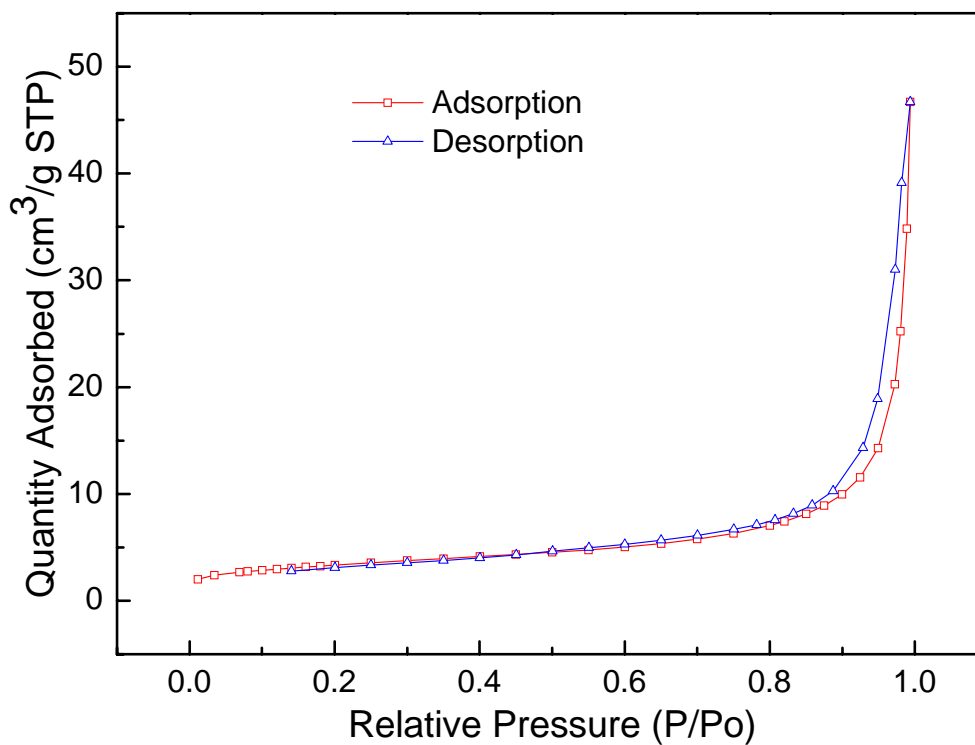

**Fig. S3** N<sub>2</sub> adsorption-desorption isotherm of the Pd STNs with the diameters of about 300 nm under high intensity ultrasound dispersion.

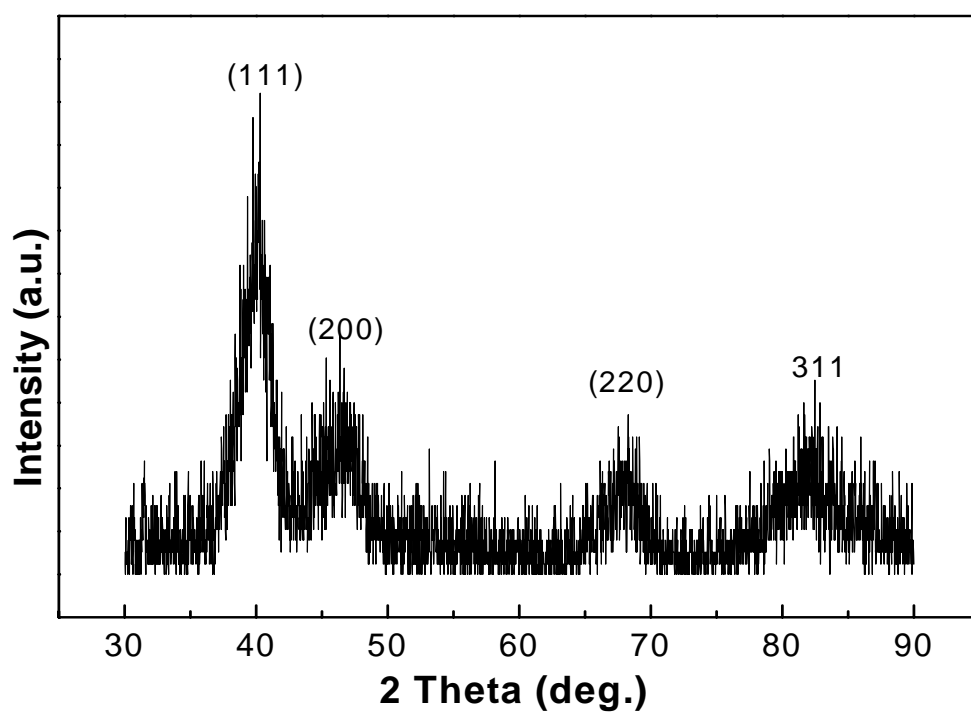

**Fig. S4** XRD pattern of the Pt STNs after removal of AAO template with NaOH solution (2.0 M).

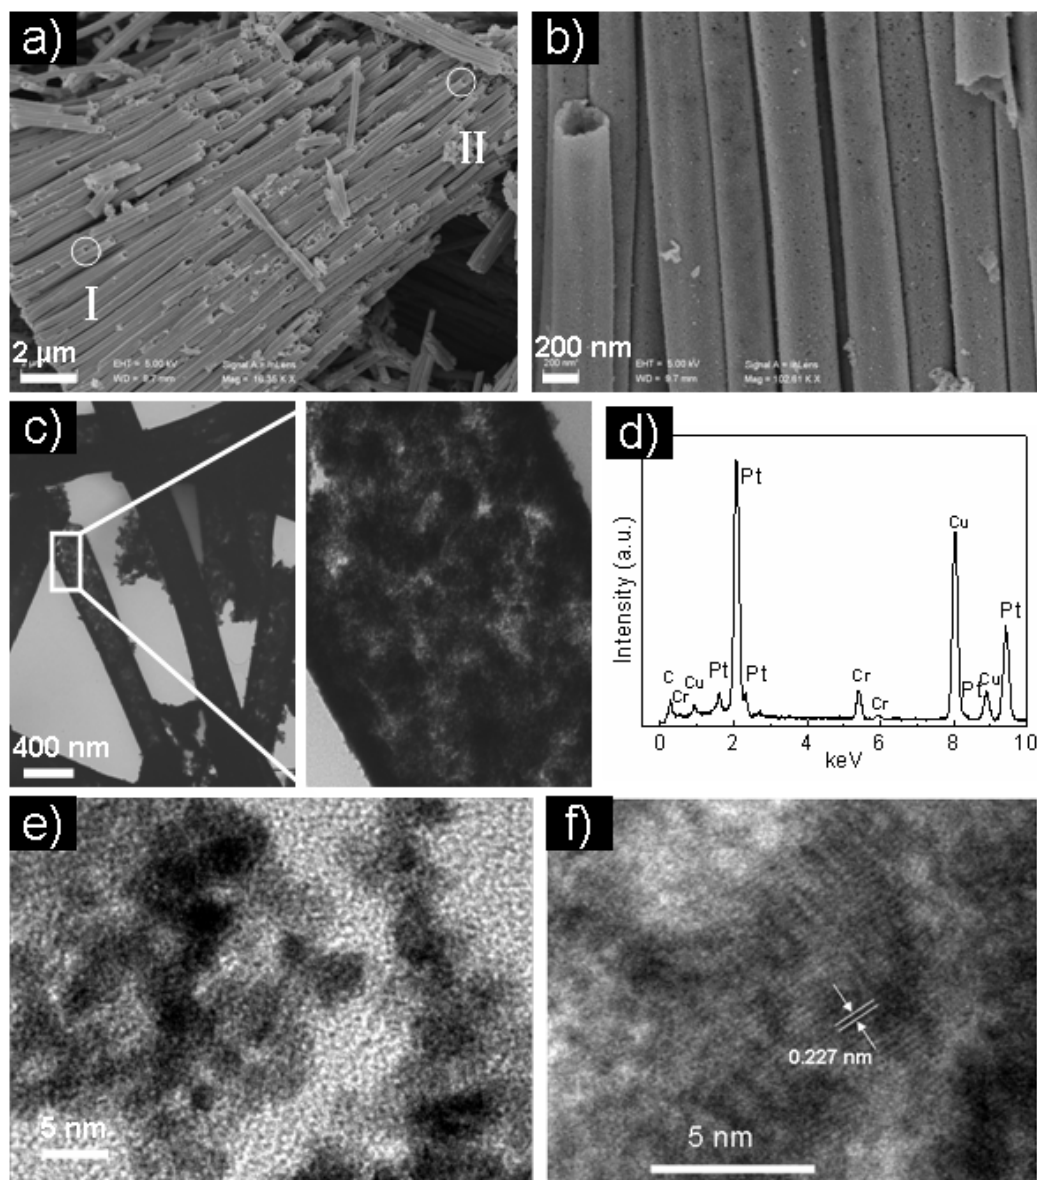

**Fig. S5** a) Side-view SEM image of the Pt STNs. The obvious orifice marked “I” near the bottom and the “II” at the tip. b) Side-view SEM image of the Pt STNs at higher magnification. c) TEM images of Pt STNs at different magnifications after high intensity ultrasound treatment. d) The corresponding EDS of the Pt STNs. e, f) HRTEM images of Pt STNs near the orifice at different magnifications.
